# Supplementary material
Source: Springer Nature journal article supplement (https://www.springermedizin.de/resource/supplementary/13012_2013_754_MOESM2_ESM.pdf/9630586)
Supplement: MOESM2 [file 9630586]

## Additional file 2 – Correlations between domains

|     |                            | D1 | D2    | D3    | D4    | D5    | D6    | D7    | D8    | D9    | D10   | D11   | D12   | D13   | D14   | D15   | D16    | D17    | D18    |
|-----|----------------------------|----|-------|-------|-------|-------|-------|-------|-------|-------|-------|-------|-------|-------|-------|-------|--------|--------|--------|
| D1  | Knowledge                  |    | .71** | .68** | .35** | .09   | .38** | .24** | .17** | .20** | .04   | .14*  | .14*  | .06   | .16*  | .33** | -.30** | .28**  | .25**  |
| D2  | Skills                     |    |       | .76** | .40** | .12*  | .45** | .36** | .18** | .16** | .02   | .13*  | .21** | .03   | .24** | .32** | -.30** | .39**  | .38**  |
| D3  | Social/professional R&I    |    |       |       | .34** | .08   | .46** | .41** | .21** | .15*  | .08   | .10   | .21** | .10   | .27** | .26** | -.25** | .32**  | .34**  |
| D4  | Beliefs about capabilities |    |       |       |       | .30** | .52** | .40** | .26** | .53** | .12   | .32** | .29** | .22** | .41** | .47** | -.35** | .64**  | .56**  |
| D5  | Optimism                   |    |       |       |       |       | .24** | .08   | .06   | .21** | .08   | .23*  | .18** | .02   | .16** | .30** | -.15*  | .21**  | .16**  |
| D6  | Beliefs about consequences |    |       |       |       |       |       | .50** | .34** | .32** | .13*  | .29** | .39** | .27** | .45** | .50** | -.30** | .52**  | .42**  |
| D7  | Intentions                 |    |       |       |       |       |       |       | .35** | .22** | .15   | .24** | .37** | .18** | .42** | .36** | -.31** | .46**  | .47**  |
| D8  | Goals                      |    |       |       |       |       |       |       |       | .18** | .06   | .18** | .25** | .08   | .27** | .25** | -.26** | .29**  | .29    |
| D9  | Innovation                 |    |       |       |       |       |       |       |       |       | .29** | .28** | .20** | .26** | .34** | .35** | -.29** | .40**  | .43**  |
| D10 | Socio-political context    |    |       |       |       |       |       |       |       |       |       | .17** | .19** | .36** | .24** | .15*  | -.02   | .15*   | .12*   |
| D11 | Organization               |    |       |       |       |       |       |       |       |       |       |       | .19** | .16** | .31** | .28** | -.27** | .19**  | .20**  |
| D12 | Patient                    |    |       |       |       |       |       |       |       |       |       |       |       | .17** | .42** | .34** | -.22** | .33**  | .36**  |
| D13 | Innovation strategy        |    |       |       |       |       |       |       |       |       |       |       |       |       | .25** | .16** | -.02   | .11    | .08    |
| D14 | Social influences          |    |       |       |       |       |       |       |       |       |       |       |       |       |       | .37** | -.21** | .46**  | .45**  |
| D15 | Positive emotions          |    |       |       |       |       |       |       |       |       |       |       |       |       |       |       | -.52** | .48**  | .38    |
| D16 | Negative emotions          |    |       |       |       |       |       |       |       |       |       |       |       |       |       |       |        | -.37** | -.33** |
| D17 | Behavioral regulation      |    |       |       |       |       |       |       |       |       |       |       |       |       |       |       |        |        | .52**  |
| D18 | Nature of the behaviors    |    |       |       |       |       |       |       |       |       |       |       |       |       |       |       |        |        |        |

Note. \*,  $p < .05$ ; \*\*,  $p < .01$
